# Supplementary material
Source: publisher figshare collection journal article supplement (https://tandf.figshare.com/articles/dataset/_/9976118)
Supplement: Supplementary file 4 [file 2]

Archive with 4 entries (4 files):
- iiht_a_957426_sm7827.pdf
- iiht_a_957426_sm7826.pdf
- iiht_a_957426_sm7823.pdf
- iiht_a_957426_sm7816.pdf
